# Supplementary material for: Multicomponent crystals of clotrimazole: a combined theoretical and experimental study
Source: Royal Society of Chemistry journal article supplement (doi:10.1039/d1ce00934f), 2021-01-01
Supplement: d1ce00934f1.pdf [file d1ce00934f1.pdf]

# Supporting Information

## Multicomponent Crystals of Clotrimazole: A Combined Theoretical and Experimental Study

Chang Li<sup>a</sup>, Di Wu<sup>a</sup>, Jiulong, Li<sup>a</sup>, Xu Ji<sup>a</sup>, Luguang Qi<sup>a</sup>, Qin Sun<sup>b</sup>, Aiyu Wang<sup>c</sup>, Chuang  
Xie<sup>a,d</sup>, Junbo Gong<sup>a,d</sup>, Wei Chen<sup>a,d\*</sup>

<sup>a</sup> National Engineering Research Center of Industrial Crystallization Technology, School of Chemical Engineering and Technology, Tianjin University, Tianjin 300072, P. R. China;

<sup>b</sup> Shenyang Sinochem Agrochemicals R&D Co., Ltd, Shenyang, Liaoning, 110021 P. R. China;

<sup>c</sup> Shandong Lukang pharmaceutical Co., Ltd, Jining, Shandong, 272104, P. R. China;

<sup>d</sup> Collaborative Innovation Center of Chemical Science and Engineering, Tianjin 300072, P. R. China;

### AUTHOR INFORMATION

\* Corresponding author.

E-mail address: chenwei@tju.edu.cn (Wei Chen)

Telephone number: (86) 13820153932

## Contents

**Fig. S1** HPLC standard curve of CLT.

**Fig. S2** PXRD patterns of raw materials and multicomponent crystals. (Exp: The experiment of synthetic, Cal: Calculated from the crystal structure).

**Fig. S3** DSC curves of coformers in nine multicomponent crystals.

**Fig. S4** DSC curves of CLT and multicomponent crystals.

**Fig. S5** TGA and DSC curves of CLT-35DBA.

**Fig. S6** TGA and DSC curves of CLT-14NA.

**Fig. S7** TGA and DSC curves of CLT-SA.

**Fig. S8** X-ray diffraction pattern of CLT-35DBA after solvent removal.

**Fig. S9** The melting process of CLT-14NA salt was observed with a HSM. The HSM photograph showed that the ethanol could desolation until the melting point (108°C-113°C).

**Fig. S10** The melting process of CLT-SA cocrystal was observed with a HSM. The HSM photograph showed that the acetonitrile could desolation until the melting point (90°C-98°C).

**Fig. S11** FTIR spectrogram of the starting materials and multicomponent crystals.(a)CLT-35DSA, (b) CLT-35DBA, (c) CLT-ICA, (d) CLT-SA, (e) CLT-3NA,(f) CLT-14NA, (g) CLT-PA,(h) CLT-23DA,(i) CLT-124BA.

**Fig. S12** 2D fingerprint plots according to the  $d_{\text{norm}}$  value about different interactions. (a) CLT-35DSA, (b) CLT-35DBA, (c) CLT-ICA, (d) CLT-SA, (e) CLT-3NA, (f) CLT-14NA, (g) CLT-PA-A, (h) CLT-PA-B, (i) CLT-23DA, (j) CLT-124BA.

**Fig. S13** PXRD patterns of multicomponent crystals before and after equilibrium solubility experiments (SE).

**Fig. S14** PXRD patterns of CLT and its multicomponent crystals before and after equilibrium solubility experiments (SE).

**Table S1.** Preparation of CLT Multicomponent Crystals

**Table S2.** Calculation Results of Excess Enthalpy for 1:1 at 25°C

**Table S3.** Melting points and Fusion enthalpy of CLT, Coformers, and the Salts/Cocrystals

**Table S4.** Hydrogen Bond Geometrical Parameters of Cocrystals and Salts

**Table S5.** Summary of the Various Contact Contributions to the Hirshfeld Surface Area in all Cocrystals and Salts

**Table S6.** Solubility of CLT and Multicomponent Crystals in Ethanol -Water (4:6 v/v) at 37 °C

**Supporting Figures:**

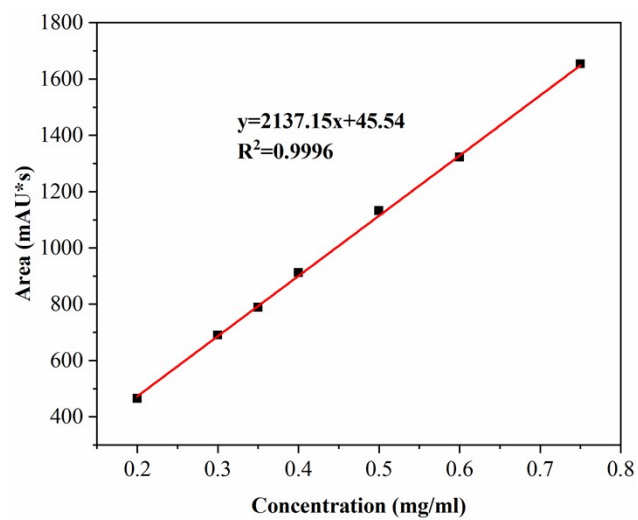

**Fig. S1** HPLC standard curve of CLT.

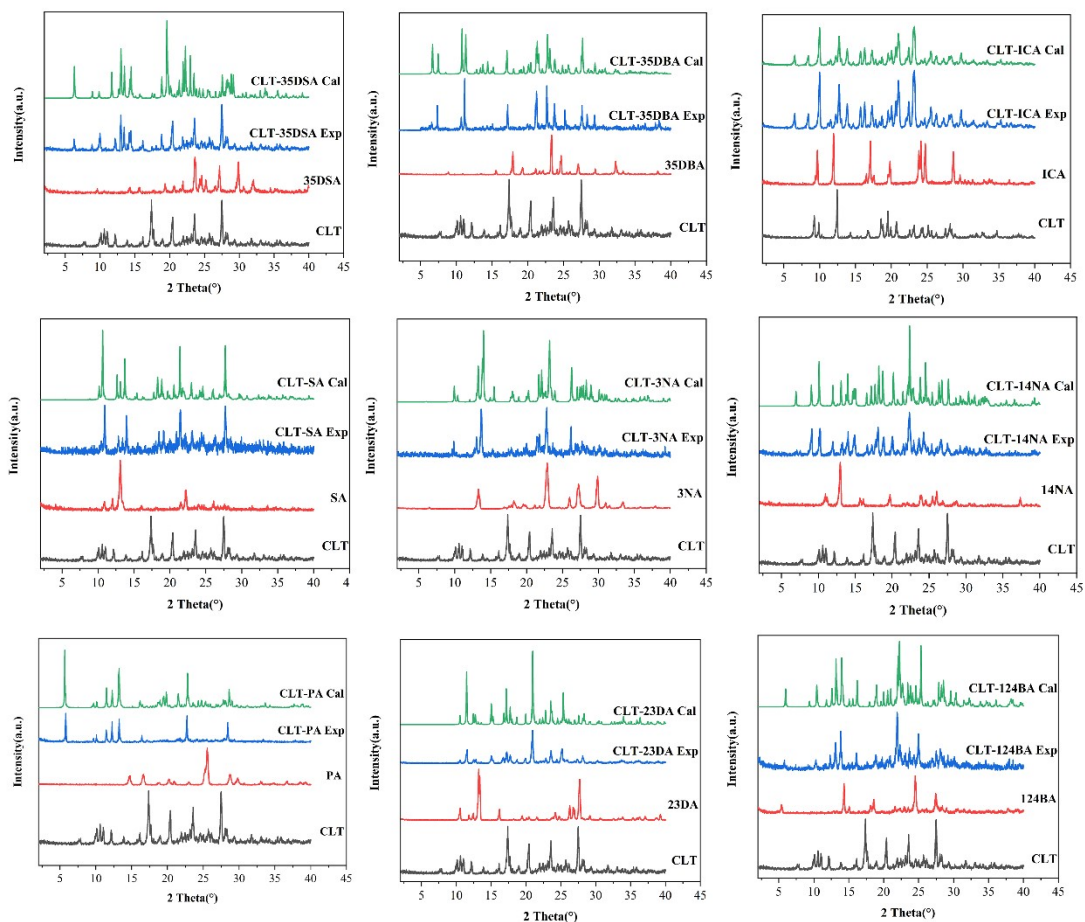

**Fig. S2** PXR D patterns of raw materials and multicomponent crystals. (Exp: The experiment of synthetic, Cal: Calculated from the crystal structure).

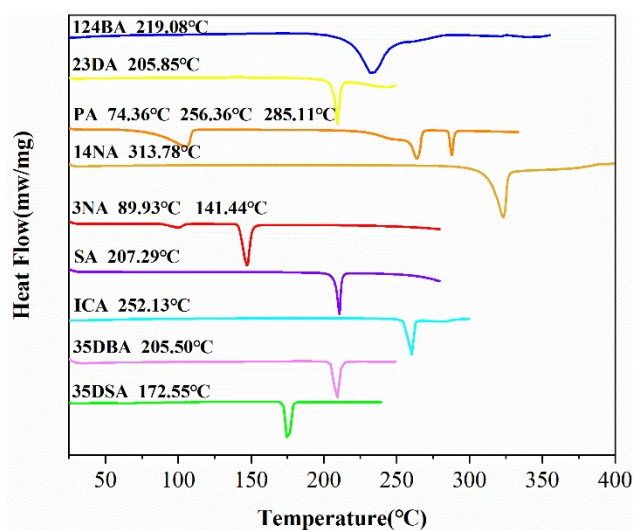

**Fig. S3** DSC curves of cofomers in nine multicomponent crystals.

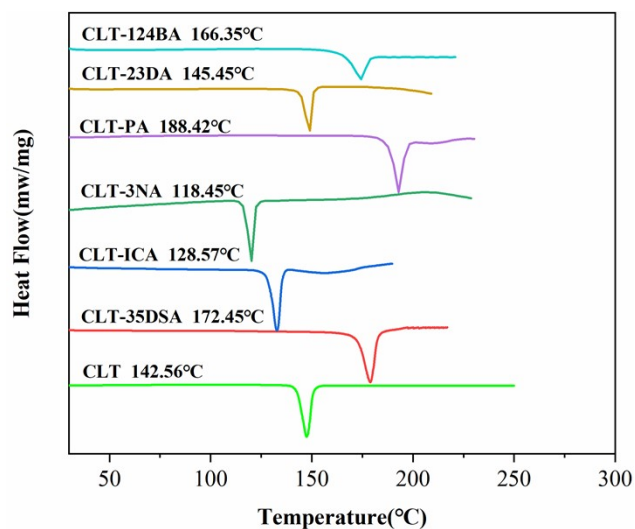

**Fig. S4** DSC curves of CLT and multicomponent crystals.

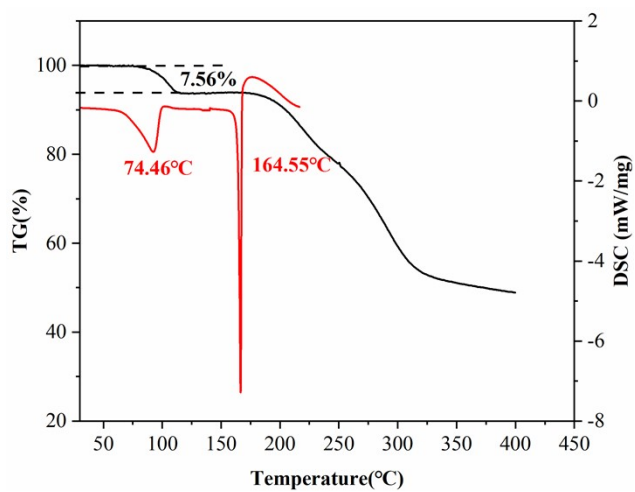

**Fig. S5** TGA and DSC curves of CLT-35DBA.

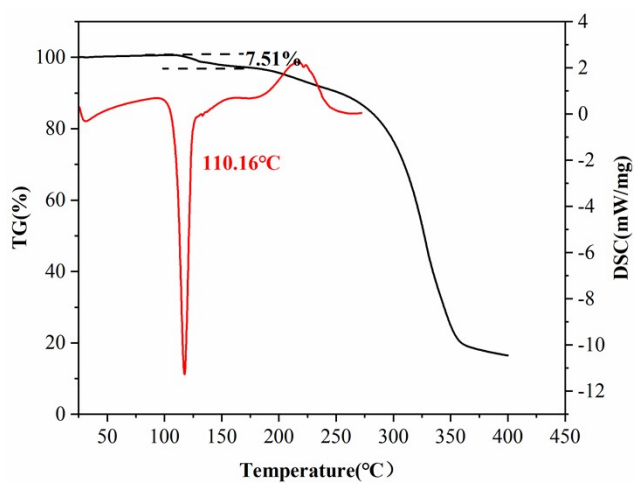

**Fig. S6** TGA and DSC curves of CLT-14NA.

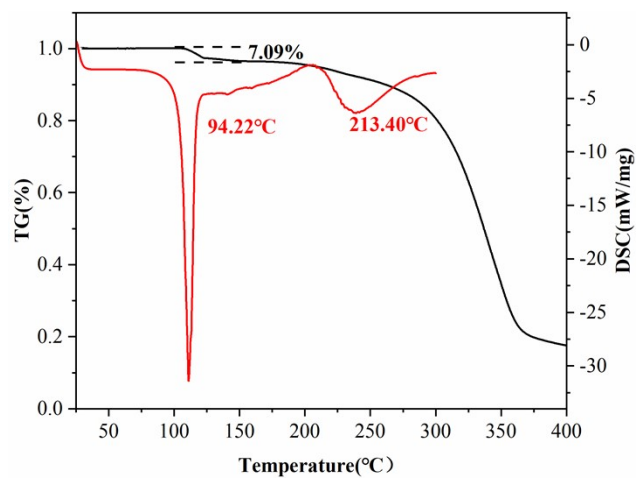

**Fig. S7** TGA and DSC curves of CLT-SA.

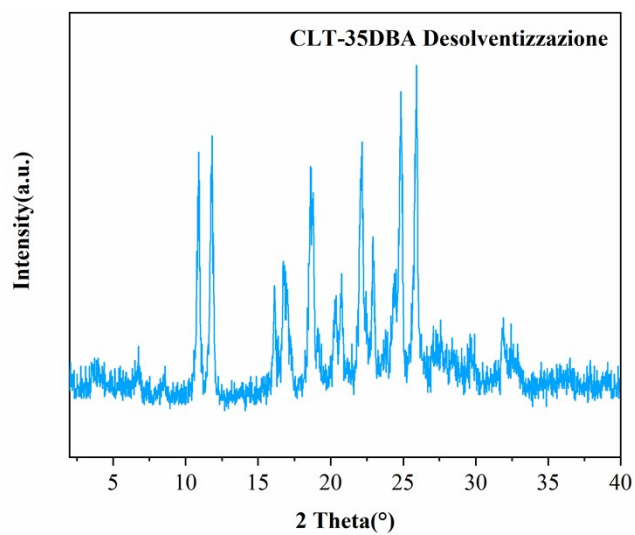

**Fig. S8** X-ray diffraction pattern of CLT-35DBA after solvent removal.

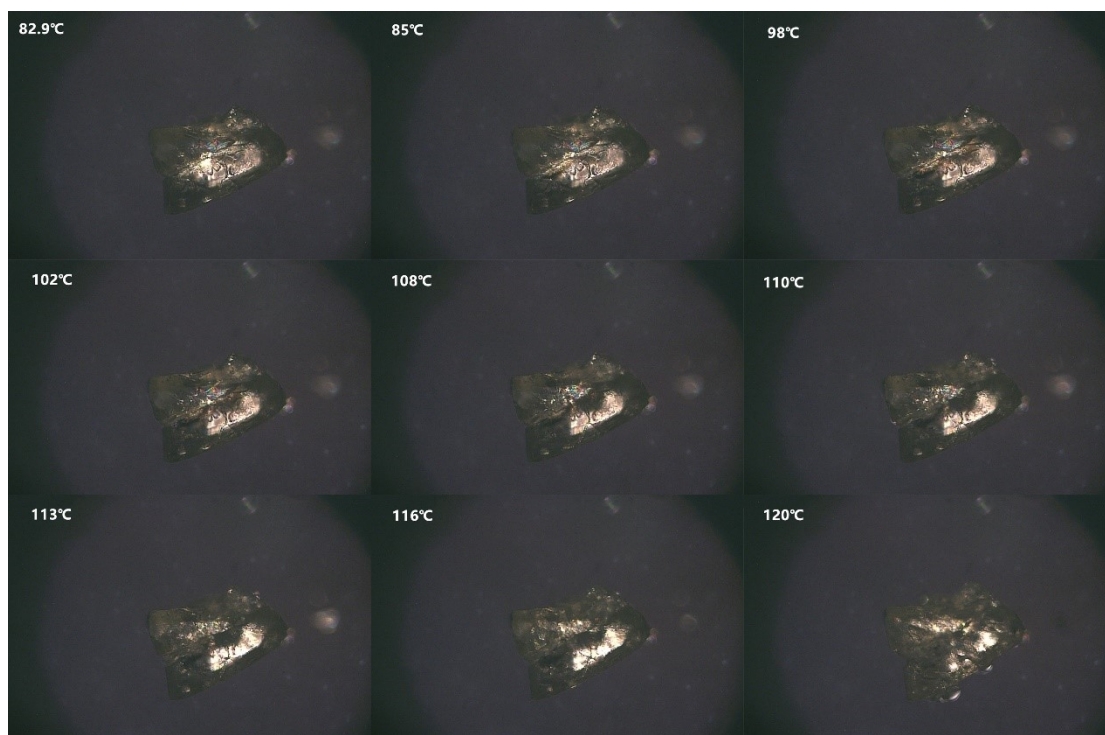

**Fig. S9** The melting process of CLT-14NA salt was observed with a HSM. The HSM photograph showed that the ethanol could desolation until the melting point (108°C-113°C).

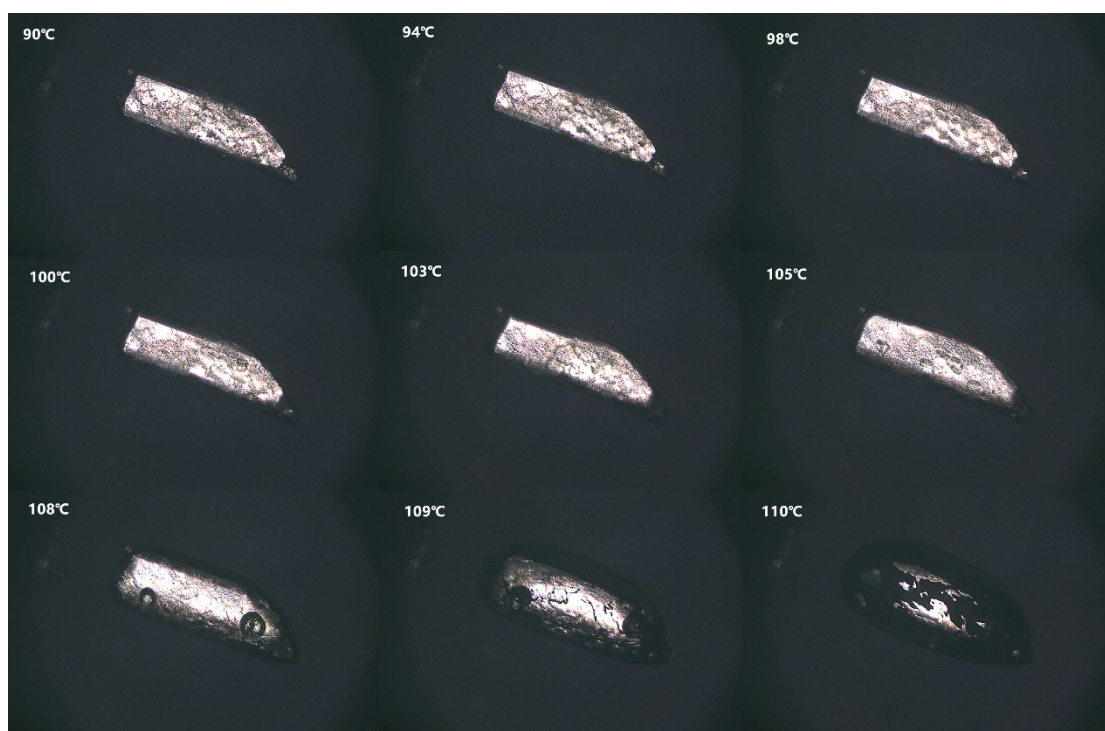

**Fig. S10** The melting process of CLT-SA cocrystal was observed with a HSM. The HSM photograph showed that the acetonitrile could desolation until the melting point (90°C-98°C).



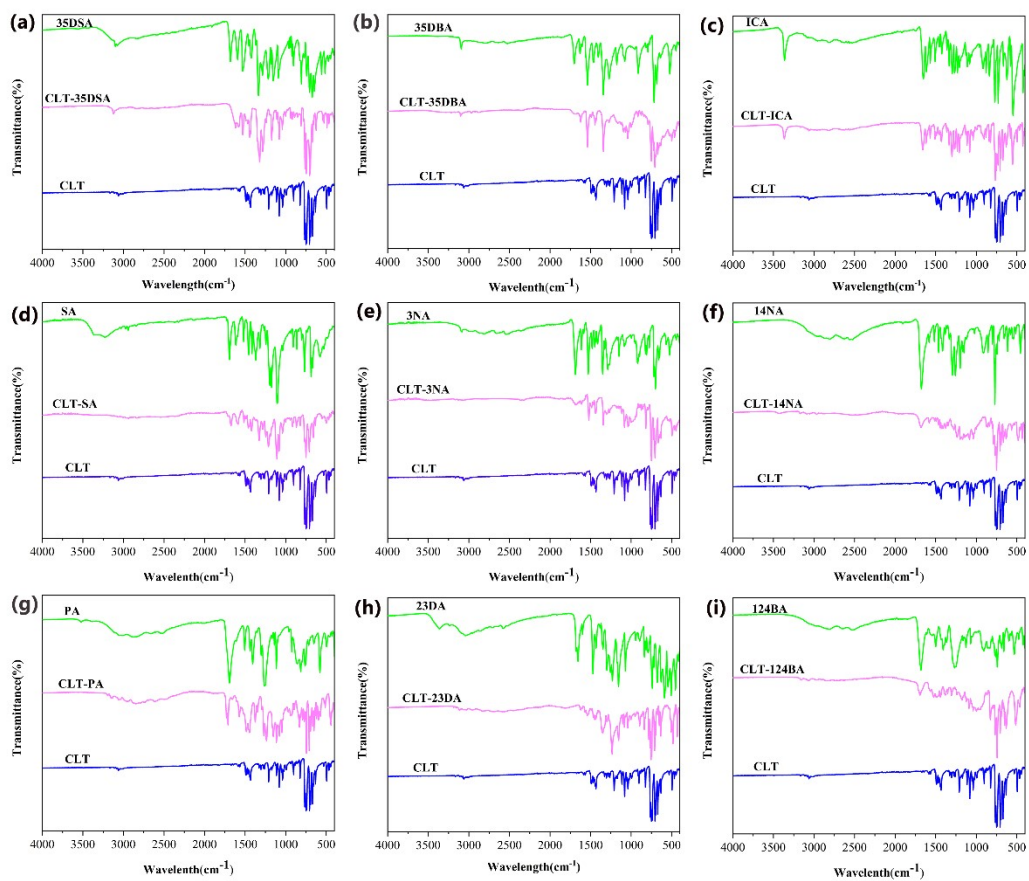

**Fig. S11** FTIR spectrogram of the starting materials and multicomponent crystals.(a)CLT-35DSA, (b) CLT-35DBA, (c) CLT-ICA, (d) CLT-SA, (e) CLT-3NA,(f) CLT-14NA, (g) CLT-PA,(h) CLT-23DA,(i) CLT-124BA.

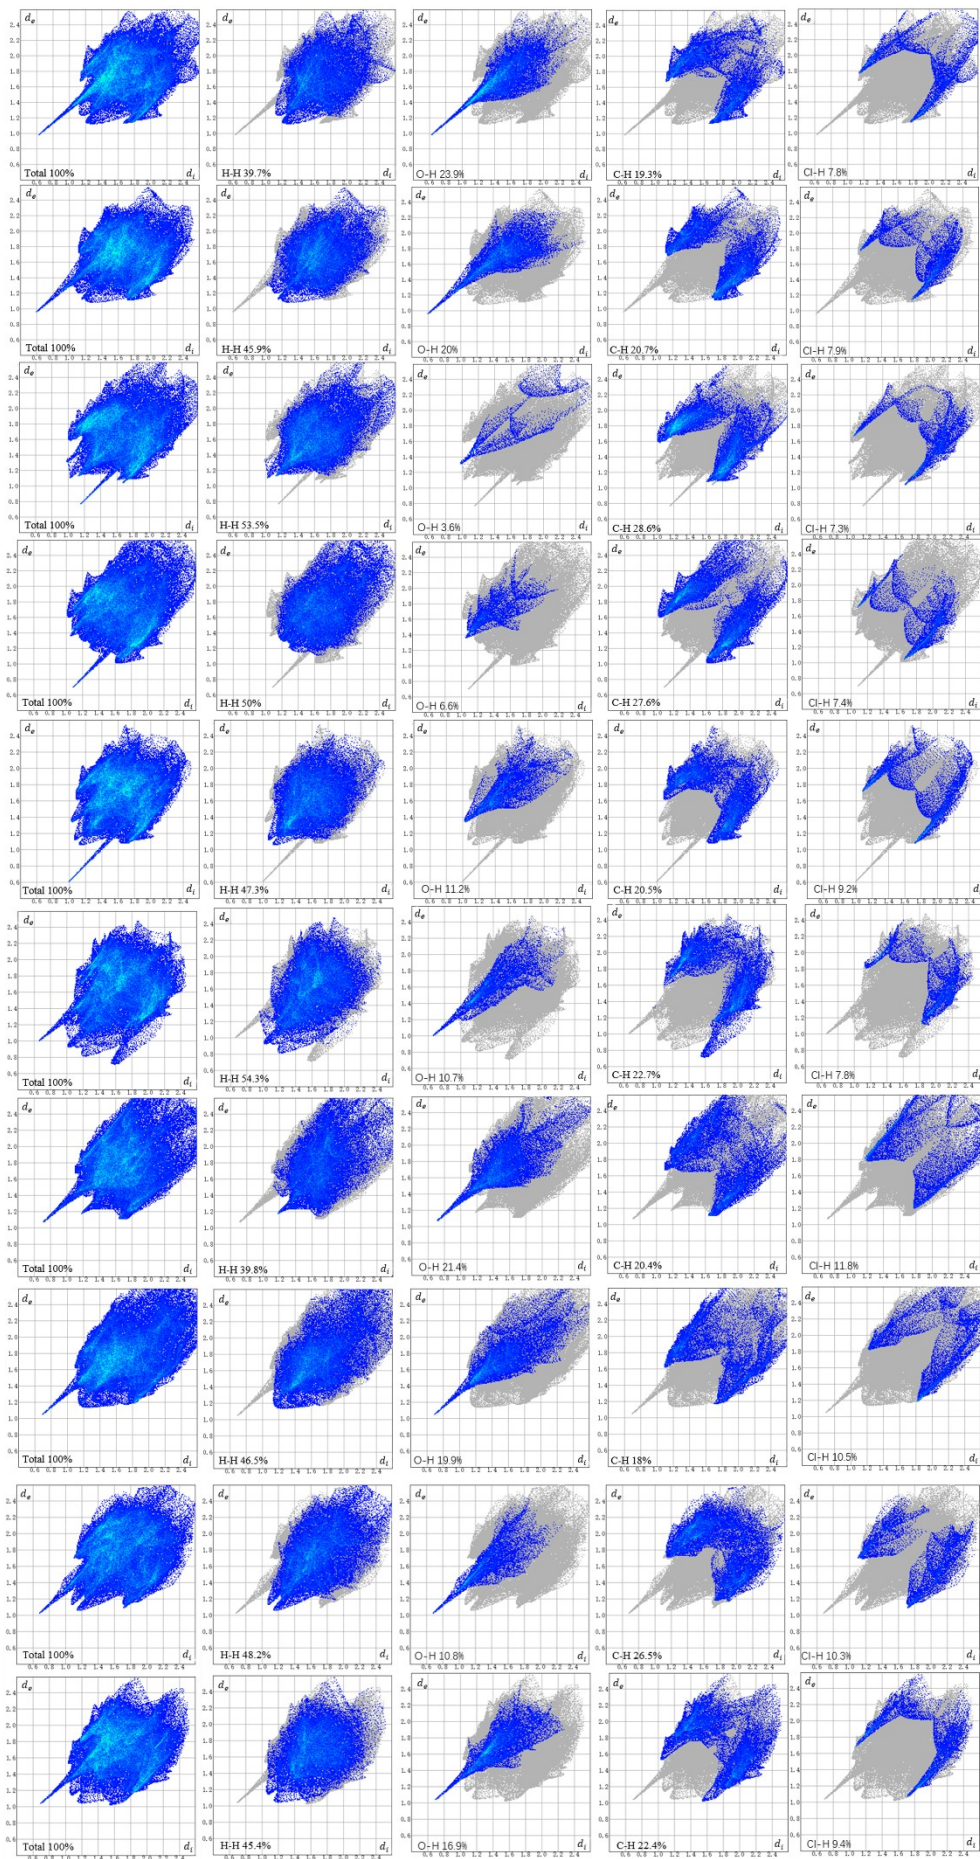

**Fig. S12** 2D fingerprint plots according to the dnorm value about different interactions. (a) CLT-35DSA, (b) CLT-35DBA, (c) CLT-ICA, (d) CLT-SA, (e) CLT-3NA, (f) CLT-14NA, (g) CLT-PA-A, (h) CLT-PA-B, (i) CLT-23DA, (j) CLT-124BA.

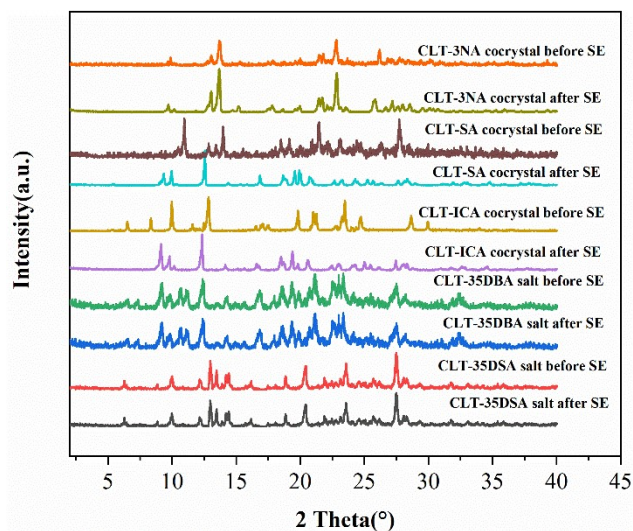

**Fig. S13** PXRD patterns of multicomponent crystals before and after equilibrium solubility experiments (SE).

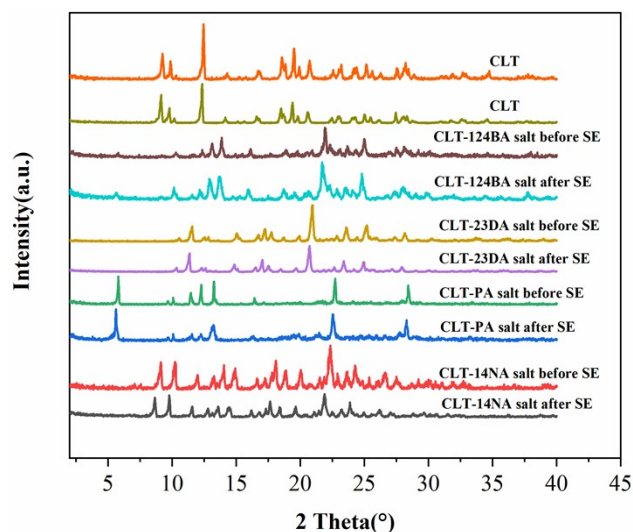

**Fig. S14** PXRD patterns of CLT and its multicomponent crystals before and after equilibrium solubility experiments (SE).

### Supporting Tables:

**Table S1.** Preparation of CLT Multicomponent Crystals

| complex   | detail                                                                                      |
|-----------|---------------------------------------------------------------------------------------------|
| CLT-35DSA | <b>liquid-assisted grinding method</b><br>CLT: 0.1mmol; 35DSA: 0.1mmol; Ethanol: 10 $\mu$ L |

|                                          |                                                   |
|------------------------------------------|---------------------------------------------------|
| CLT-35DBA                                | CLT: 0.1mmol; 35DBA: 0.1mmol; Ethanol: 10 $\mu$ L |
| CLT-ICA                                  | CLT: 0.1mmol; 35DSA: 0.1mmol; Ethanol: 10 $\mu$ L |
| CLT-SA                                   | CLT: 0.1mmol; SA: 0.1mmol; Ethanol: 10 $\mu$ L    |
| CLT-3NA                                  | CLT: 0.1mmol; 3NA: 0.1mmol; Ethanol: 10 $\mu$ L   |
| CLT-14NA                                 | CLT: 0.1mmol; 14NA: 0.1mmol; Ethanol: 10 $\mu$ L  |
| CLT-PA                                   | CLT: 0.1mmol; PA: 0.1mmol; Ethanol: 10 $\mu$ L    |
| CLT-23DA                                 | CLT: 0.1mmol; 23DA: 0.1mmol; Ethanol: 10 $\mu$ L  |
| CLT-124BA                                | CLT: 0.1mmol; 124BA: 0.1mmol; Ethanol: 10 $\mu$ L |
| <b>Slurry suspension method</b>          |                                                   |
| CLT-35DSA                                | CLT: 0.01mol; 35DSA: 0.01mol; Ethanol: 10mL       |
| CLT-35DBA                                | CLT: 0.01mol; 35DBA: 0.01mol; Ethanol: 10mL       |
| CLT-ICA                                  | CLT: 0.01mol; 35DSA: 0.01mol; Acetonitrile: 10mL  |
| CLT-SA                                   | CLT: 0.01mol; SA: 0.01mol; Acetonitrile: 10mL     |
| CLT-3NA                                  | CLT: 0.01mol; 3NA: 0.01mol; Ethanol: 10mL         |
| CLT-14NA                                 | CLT: 0.01mol; 14NA: 0.01mol; Ethanol: 10mL        |
| CLT-PA                                   | CLT: 0.01mol; PA: 0.01mol; Methanol: 10mL         |
| CLT-23DA                                 | CLT: 0.01mol; 23DA: 0.01mol; Ethanol: 10mL        |
| CLT-124BA                                | CLT: 0.01mol; 124BA: 0.01mol; Ethanol: 10mL       |
| <b>Slowly solvent evaporation method</b> |                                                   |
| CLT-35DSA                                | CLT: 0.004mol; 35DSA: 0.04mol; Ethanol: 4mL       |
| CLT-35DBA                                | CLT: 0.004mol; 35DBA: 0.04mol; Ethanol: 4mL       |
| CLT-ICA                                  | CLT: 0.004mol; ICA: 0.04mol; Acetonitrile: 4mL    |
| CLT-SA                                   | CLT: 0.004mol; SA: 0.04mol; Acetonitrile: 4mL     |
| CLT-3NA                                  | CLT: 0.004mol; 3NA: 0.04mol; Ethanol: 4mL         |
| CLT-14NA                                 | CLT: 0.004mol; 14NA: 0.04mol; Ethanol: 4mL        |
| CLT-PA                                   | CLT: 0.004mol; 35DBA: 0.04mol; Methanol: 4mL      |
| CLT-23DA                                 | CLT: 0.004mol; 23DA: 0.04mol; Ethanol: 4mL        |
| CLT-124BA                                | CLT: 0.004mol; 124BA: 0.04mol; Ethanol: 4mL       |

**Table S2.** Calculation Results of Excess Enthalpy for 1:1 at 25°C

|    | coformer                        | $\Delta H_{ex}$ (kcal/mol) | new form |   |
|----|---------------------------------|----------------------------|----------|---|
| 1  | 3,5-dinitrosalicylic acid       | -5.973                     | ✓        | ★ |
| 2  | pyromellitic acid               | -5.691                     | ✓        | ★ |
| 3  | oxalic acid                     | -5.631                     | ✓        |   |
| 4  | 2,3,4-trihydroxybenzoic acid    | -5.411                     | ✓        |   |
| 5  | 3,5-dinitrobenzoic acid         | -4.857                     | ✓        | ★ |
| 6  | 2,4,6-trihydroxybenzoic acid    | -4.728                     | ✓        | ☆ |
| 7  | 1,2,4-benzenetricarboxylic acid | -4.670                     | ✓        | ★ |
| 8  | dimethylglyoxime                | -4.415                     | ✓        |   |
| 9  | 2,5-dihydroxybenzoic acid       | -4.406                     | ✓        | ☆ |
| 10 | 2,3-dihydroxybenzoic acid       | -4.375                     | ✓        | ★ |
| 11 | citrazinic acid                 | -4.342                     |          |   |
| 12 | fumaric acid                    | -4.325                     |          |   |
| 13 | 2,5-furandicarboxylic acid      | -4.191                     | ✓        |   |
| 14 | 4-nitrosalicylic acid           | -4.100                     |          |   |
| 15 | barbituric acid                 | -3.980                     | ✓        |   |

|    |                                   |        |   |   |
|----|-----------------------------------|--------|---|---|
| 16 | terephthalic acid                 | -3.958 |   |   |
| 17 | 3-nitrobenzoic acid               | -3.788 | ✓ | ★ |
| 18 | 1,4-naphthalenedicarboxylic acid  | -3.720 | ✓ | ★ |
| 19 | thymol                            | -3.666 |   |   |
| 20 | hydroquinone                      | -3.649 |   |   |
| 21 | 2,2-diphenylacetic acid           | -3.260 |   |   |
| 22 | sasapyrine                        | -3.123 |   |   |
| 23 | vanillic acid                     | -3.093 |   |   |
| 24 | maleic acid                       | -3.084 | ✓ | ☆ |
| 25 | 2,6-pyridinedicarboxylic acid     | -2.956 | ✓ |   |
| 26 | syringic acid                     | -2.951 | ✓ | ★ |
| 27 | acetylsalicylic acid              | -2.946 | ✓ |   |
| 28 | glutaric acid                     | -2.933 |   |   |
| 29 | 1,4-cyclohexanedicarboxylic acid  | -2.897 |   |   |
| 30 | pimelic acid                      | -2.813 | ✓ | ☆ |
| 31 | suberic acid                      | -2.800 | ✓ | ☆ |
| 32 | 1-hydroxy-2-naphthoic acid        | -2.421 |   |   |
| 33 | glycolic acid                     | -2.286 |   |   |
| 34 | acipimox                          | -2.222 |   |   |
| 35 | indole-6-carboxylic acid          | -2.176 | ✓ | ★ |
| 36 | 4-aminobenzoic acid               | -2.143 |   |   |
| 37 | 1H-pyrazole-4-carboxylic acid     | -1.838 |   |   |
| 38 | p-acetylamino benzoic acid        | -1.721 |   |   |
| 39 | 2-hydroxypyridine                 | -1.671 |   |   |
| 40 | acetaminophen                     | -1.605 |   |   |
| 41 | 2-pyrazinecarboxylic acid         | -1.564 |   |   |
| 42 | prothioconazole                   | -1.545 |   |   |
| 43 | 4-hydroxy-3-methoxy-benzaldehyde  | -1.528 |   |   |
| 44 | 3-aminopyrazine-2-carboxylic acid | -1.495 |   |   |
| 45 | quinaldic acid                    | -1.457 |   |   |
| 46 | kojic acid                        | -1.394 |   |   |
| 47 | 4-hydroxybenzamide                | -1.313 |   |   |
| 48 | n-acetylglycine                   | -1.292 |   |   |
| 49 | isonipecotic acid                 | -1.187 |   |   |
| 50 | riluzole                          | -1.111 |   |   |
| 51 | diflubenzuron                     | -1.110 |   |   |
| 52 | ticagrelor                        | -1.103 |   |   |
| 53 | rhodanine                         | -1.077 |   |   |
| 54 | saccharin                         | -1.028 |   |   |
| 55 | L-tyrosine                        | -0.964 |   |   |
| 55 | phenoxazine                       | -0.905 |   |   |

|    |                                |        |
|----|--------------------------------|--------|
| 56 | celecoxib                      | -0.823 |
| 57 | 8-hydroxyquinoline             | -0.820 |
| 58 | fenbendazole                   | -0.811 |
| 59 | D-mannitol                     | -0.738 |
| 60 | L(+)-2-aminobutyric acid       | -0.712 |
| 61 | salicylamide                   | -0.703 |
| 62 | daminozide                     | -0.695 |
| 63 | hydrochlorothiazide            | -0.668 |
| 64 | tris base                      | -0.624 |
| 65 | 2,4-dihydroxy-6-methylpyridine | -0.594 |
| 66 | L-threonine                    | -0.568 |

√ Form multicomponent crystals proved by PXRD.

★ Single crystal synthesized in this work.

☆ Single crystals that has been reported.<sup>[1]</sup>

**Table S3.** Melting points and Fusion enthalpy of CLT, Coformers, and the Salts/Cocrystals

|           | $T_m$ (°C) | uncertainty (°C) <sup>a</sup> | $\Delta_{fus}H$ (J/g) | Uncertainty (J/g) <sup>a</sup> |
|-----------|------------|-------------------------------|-----------------------|--------------------------------|
| CLT       | 142.42     | 0.02                          | 114.73                | 1.45                           |
| 35DSA     | 172.34     | 0.03                          | 150.88                | 1.29                           |
| 35DBA     | 205.01     | 0.38                          | 142.32                | 0.81                           |
| ICA       | 253.06     | 0.53                          | 225.37                | 0.90                           |
| SA        | 207.27     | 0.81                          | 190.04                | 1.47                           |
| 3NA       | 141.28     | 0.12                          | 135.11                | 1.66                           |
| 14NA      | 314.46     | 0.35                          | 287.81                | 1.52                           |
| PA        | 256.48     | 0.57                          | 535.12                | 1.48                           |
| 23DA      | 206.10     | 0.04                          | 221.23                | 0.76                           |
| 124BA     | 218.73     | 0.50                          | 428.03                | 1.42                           |
| CLT-35DSA | 171.44     | 0.83                          | 86.23                 | 1.18                           |
| CLT-35DBA | 164.56     | 0.43                          | 86.98                 | 0.95                           |
| CLT-ICA   | 127.95     | 0.61                          | 101.51                | 1.19                           |
| CLT-SA    | 94.69      | 0.21                          | 114.24                | 1.04                           |
| CLT-3NA   | 118.53     | 0.57                          | 88.14                 | 1.67                           |
| CLT-14NA  | 109.49     | 0.28                          | 85.33                 | 0.91                           |
| CLT-PA    | 188.12     | 0.43                          | 89.32                 | 0.18                           |
| CLT-23DA  | 144.56     | 0.47                          | 117.41                | 1.74                           |
| CLT-124BA | 166.31     | 0.50                          | 74.49                 | 1.04                           |

<sup>a</sup> The uncertainty is calculated at a confidence level of 0.95.

**Table S4.** Hydrogen Bond Geometrical Parameters of Cocrystals and Salts

| D-H...A          | d(H...D)/Å | d(H...A)/Å | d(D...A)/Å | $\theta$ (D-H...A)/° | symmetry code |
|------------------|------------|------------|------------|----------------------|---------------|
| <b>CLT-35DSA</b> |            |            |            |                      |               |

|                  |         |         |            |           |             |
|------------------|---------|---------|------------|-----------|-------------|
| N1-H1...O1       | 0.81(3) | 1.82(3) | 2.610(3)   | 167(3)    |             |
| C8-H8...O2       | 0.93    | 2.46    | 3.316(4)   | 154       | 1-x,-y,1-z  |
| C9-H9...O6       | 0.93    | 2.55    | 3.354(3)   | 146       | 2-x,1-y,1-z |
| C15-H15...O5     | 0.93    | 2.59    | 3.264(4)   | 130       | 2-x,1-y,1-z |
| C23-H23...N2     | 0.93    | 2.58    | 2.897(3)   | 101       |             |
| C27-H27...O4     | 0.93    | 2.55    | 3.351(4)   | 145       | -1+x,y,1+z  |
| <b>CLT-35DBA</b> |         |         |            |           |             |
| N1-H1...O2       | 0.91(2) | 1.67(2) | 2.576(2)   | 169(2)    | x,1+y,z     |
| O7-H7A...O1      | 0.86(3) | 1.85(3) | 2.700(3)   | 174(2)    |             |
| C8-H8...O7       | 0.93    | 2.29    | 3.130(3)   | 149       |             |
| C9-H9...O6       | 0.93    | 2.32    | 3.093(3)   | 140       | x,1+y,z     |
| C17-H17...O2     | 0.93    | 2.57    | 3.495(2)   | 170       | 1-x,2-y,1-z |
| <b>CLT-ICA</b>   |         |         |            |           |             |
| O1-H1...O2       | 0.82    | 1.82    | 2.6424(17) | 175       | -x,-y,2-z   |
| N3-H3...N1       | 0.92(2) | 2.04(2) | 2.9280(18) | 164.1(17) |             |
| C21-H21...N2     | 0.93    | 2.50    | 2.8371(19) | 101       |             |
| C28-H28...O2     | 0.93    | 2.45    | 3.288(2)   | 150       | -x,-y,2-z   |
| <b>CLT-SA</b>    |         |         |            |           |             |
| O1-H1...O3       | 0.82    | 2.25    | 2.686(2)   | 114       |             |
| O1-H1...N1       | 0.82    | 1.95    | 2.724(2)   | 157       |             |
| O5-H5...O4       | 0.83(4) | 1.77(4) | 2.590(2)   | 170(6)    | 2-x,1-y,2-z |
| C7-H7B...C11     | 0.95(2) | 2.83(3) | 3.658(3)   | 146.4(19) | x,1+y,z     |
| C15-H15...N2     | 0.93    | 2.53    | 2.860(3)   | 101       |             |
| C28-H28...O1     | 0.93    | 2.55    | 3.289(3)   | 137       | x,-1+y,z    |
| <b>CLT-3NA</b>   |         |         |            |           |             |
| O1-H1...N1       | 0.86(2) | 1.74(2) | 2.579(2)   | 164(3)    |             |
| C17-H17...O2     | 0.93    | 2.53    | 3.369(2)   | 151       | 1-x,1-y,1-z |
| C23-H23...N2     | 0.93    | 2.54    | 2.857(2)   | 101       |             |
| C27-H27...O3     | 0.93    | 2.51    | 3.274(3)   | 140       | 1+x,y,1+z   |
| <b>CLT-14NA</b>  |         |         |            |           |             |
| N1-H1...O2       | 0.86    | 1.81    | 2.605(4)   | 153       | 1-x,-y,1-z  |
| O4-H4...O1       | 0.82    | 1.67    | 2.492(3)   | 175       | 1+x,y,z     |
| O5-H5...O2       | 0.82    | 2.06    | 2.838(8)   | 159       | x,1+y,z     |
| C8-H8...O1       | 0.93    | 2.48    | 3.019(3)   | 117       |             |
| C11-H11...O3     | 0.93    | 2.39    | 2.988(4)   | 122       |             |
| C13-H13...O4     | 0.93    | 2.59    | 3.266(3)   | 130       | -1+x,y,z    |
| C15-H15...O5     | 0.93    | 2.36    | 3.24(2)    | 157       |             |
| C18-H18...O1     | 0.93    | 2.56    | 3.424(3)   | 155       |             |
| C24-H24...N2     | 0.93    | 2.52    | 2.863(4)   | 102       |             |
| C31-H31...O3     | 0.93    | 2.59    | 3.158(4)   | 120       | -1+x,1+y,z  |
| C32-H32...O3     | 0.93    | 2.48    | 3.106(4)   | 124       | -1+x,1+y,z  |
| C37-H37A...O5    | 0.97    | 2.54    | 3.290(13)  | 134       | 2-x,1-y,1-z |
| C37-H37A...O6    | 0.97    | 2.11    | 2.92(2)    | 139       | 2-x,1-y,1-z |
| <b>CLT-PA</b>    |         |         |            |           |             |
| N1-H1...O8       | 0.86    | 1.88    | 2.708(3)   | 161       |             |
| O1-H1A...O13     | 0.82    | 1.82    | 2.621(3)   | 166       |             |
| O1-H1A...O14     | 0.82    | 2.50    | 2.989(3)   | 120       |             |
| N3-H3...O16      | 0.86    | 1.92    | 2.738(3)   | 158       |             |
| O4-H4A...O15     | 0.82    | 1.80    | 2.609(3)   | 170       | 1+x,y,z     |
| O9-H9...O5       | 0.82    | 1.81    | 2.626(3)   | 176       | -1+x,1+y,z  |

|                  |         |         |            |           |                   |
|------------------|---------|---------|------------|-----------|-------------------|
| O9-H9···O6       | 0.82    | 2.60    | 3.100(2)   | 121       | -1+x,1+y,z        |
| O12-H12A···O7    | 0.82    | 1.81    | 2.624(3)   | 170       | x,1+y,z           |
| C4-H4···O13      | 0.93    | 2.29    | 2.673(3)   | 104       |                   |
| C7-H7···O9       | 0.93    | 2.40    | 2.739(3)   | 101       |                   |
| C7-H7···O16      | 0.93    | 2.31    | 2.686(3)   | 104       |                   |
| C13-H13···O10    | 0.93    | 2.28    | 3.051(3)   | 140       | 1-x,2-y,1-z       |
| C31-H31···O3     | 0.93    | 2.58    | 3.267(4)   | 131       | 2-x,1-y,1-z       |
| C31-H31···O3     | 0.93    | 2.58    | 3.267(4)   | 131       | 2-x,1-y,1-z       |
| C32-H32···N4     | 0.93    | 2.40    | 2.787(3)   | 105       |                   |
| C35-H35···O1     | 0.93    | 2.43    | 2.749(3)   | 100       |                   |
| C35-H35···O8     | 0.93    | 2.30    | 2.682(3)   | 104       |                   |
| C38-H38···O5     | 0.93    | 2.29    | 2.670(3)   | 104       |                   |
| C45-H45···O2     | 0.93    | 2.45    | 3.142(3)   | 131       | 2-x,1-y,1-z       |
| C64-H64···N2     | 0.93    | 2.41    | 2.792(3)   | 105       |                   |
| <b>CLT-23DA</b>  |         |         |            |           |                   |
| N1-H1···O1       | 0.86    | 1.85    | 2.649(3)   | 153       |                   |
| N1-H1···O2       | 0.86    | 2.47    | 3.006(3)   | 121       |                   |
| O1-H1A···O4      | 0.82    | 1.71    | 2.522(3)   | 171       | 3/2-x,1/2+y,1/2+z |
| O2-H2···O3       | 0.82    | 1.81    | 2.531(3)   | 146       |                   |
| C8-H8···O3       | 0.93    | 2.40    | 3.200(3)   | 144       | 3/2-x,1/2+y,1/2+z |
| C13-H13···C11    | 0.93    | 2.76    | 3.215(3)   | 111       |                   |
| C22-H22···O4     | 0.93    | 2.40    | 3.214(4)   | 146       | 3/2-x,3/2+y,1/2+z |
| C25-H25···O4     | 0.93    | 2.55    | 3.312(3)   | 140       | 1-x,-y,1/2+z      |
| C28-H28···N2     | 0.93    | 2.36    | 2.750(3)   | 105       |                   |
| <b>CLT-124BA</b> |         |         |            |           |                   |
| N1-H1···O2       | 0.86    | 1.89    | 2.7208(16) | 163       |                   |
| O1-H1A···O6      | 1.16(3) | 1.29(3) | 2.4465(15) | 176(3)    | x,-1+y,z          |
| O1-H1A···O5      | 1.16(3) | 2.45(3) | 3.0851(16) | 112.1(18) |                   |
| O3-H3···O5       | 0.82    | 1.62    | 2.4372(17) | 177       |                   |
| C3-H3A···O1      | 0.93    | 2.36    | 2.7073(17) | 102       |                   |
| C3-H3A···O4      | 0.93    | 2.28    | 2.6634(18) | 104       |                   |
| C6-H6···O6       | 0.93    | 2.29    | 2.6635(18) | 104       |                   |
| C11-H11···O4     | 0.93    | 2.39    | 3.1372(18) | 137       | -x,1-y,1-z        |
| C25-H25···N2     | 0.93    | 2.60    | 2.9074(19) | 100       |                   |
| C25-H25···O4     | 0.93    | 2.58    | 3.328(2)   | 137'      | -x,1-y,1-z        |
| C29-H29···O4     | 0.93    | 2.49    | 3.2111(18) | 134       |                   |

**Table S5.** Summary of the Various Contact Contributions to the Hirshfeld Surface Area in all Cocrystals and Salts

| compound  | H-H % | O-H % | C-H % | Cl-H % | C-C % | O-C % | Cl-O % | N-H % | N-O % | Cl-C % | N-C % |
|-----------|-------|-------|-------|--------|-------|-------|--------|-------|-------|--------|-------|
| CLT       |       |       |       |        |       |       |        |       |       |        |       |
| CLT-35DSA | 39.7  | 23.9  | 19.3  | 7.8    | 2.7   | 1.7   | 1.5    | 1.1   | 0.8   | 0.7    | 0.5   |
| CLT-35DBA | 45.9  | 20    | 20.7  | 7.9    | 0.3   | 1.4   | 0.4    | 1.5   | 0     | 0.8    | 1.1   |
| CLT-ICA   | 53.5  | 3.6   | 28.6  | 7.3    | 0     | 0.1   | 0.1    | 5.1   | 0     | 1.4    | 0.3   |
| CLT-SA    | 50    | 6.6   | 27.6  | 7.4    | 0.5   | 0     | 0      | 6.6   | 0.5   | 1.2    | 0.1   |
| CLT-3NA   | 47.3  | 11.2  | 20.5  | 9.2    | 3.9   | 0.6   | 0.7    | 4.9   | 0.3   | 1.5    | 0     |
| CLT-14NA  | 54.3  | 10.7  | 22.7  | 7.8    | 2.1   | 0.4   | 0.4    | 0.7   | 0.2   | 0.6    | 0     |
| CLT-PA-A  | 39.8  | 21.4  | 20.4  | 11.8   | 2.1   | 1.8   | 0      | 0.4   | 0.6   | 1.7    | 0     |
| CLT-PA-B  | 46.5  | 19.9  | 18    | 10.5   | 1.9   | 1.7   | 0      | 0.6   | 0.5   | 0.4    | 0     |



|           |      |      |      |      |     |     |     |     |     |     |   |
|-----------|------|------|------|------|-----|-----|-----|-----|-----|-----|---|
| CLT-23DA  | 48.2 | 10.8 | 26.5 | 10.3 | 2.2 | 0.6 | 0   | 1.0 | 0   | 0.2 | 0 |
| CLT-124BA | 45.4 | 16.9 | 22.4 | 9.4  | 0.3 | 0.3 | 0.8 | 0.8 | 0.2 | 0.4 | 0 |

**Table S6.** Solubility of CLT and Multicomponent Crystals in Ethanol -Water (4:6 v/v) at 37 °C

|                   | Solubility(mg/ml) |
|-------------------|-------------------|
| CLT               | 1.01 ± 0.03       |
| CLT-35DSA salt    | 0.12 ± 0.03       |
| CLT-35DBA salt    | 0.51 ± 0.04       |
| CLT-ICA cocrystal | 1.55 ± 0.03       |
| CLT-SA cocrystal  | 1.95 ± 0.02       |
| CLT-3NA cocrystal | 2.25 ± 0.03       |
| CLT-14NA salt     | 2.4 ± 0.03        |
| CLT-PA salt       | 0.38 ± 0.02       |
| CLT-23DA salt     | 3.16 ± 0.04       |
| CLT-124BA salt    | 2.89 ± 0.02       |

[1]. S. Mittapalli, M. K. C. Mannava, U. B. R. Khandayilli, S. Allu and A. Nangia, Cryst. Growth Des., 2015, 15, 2493-2504.
